# Supplementary material
Source: Springer Nature journal article supplement (https://www.springermedizin.de/resource/supplementary/12885_2011_2767_MOESM8_ESM.pdf/9461894)

Normalized and Temp-Shifted Difference Plot

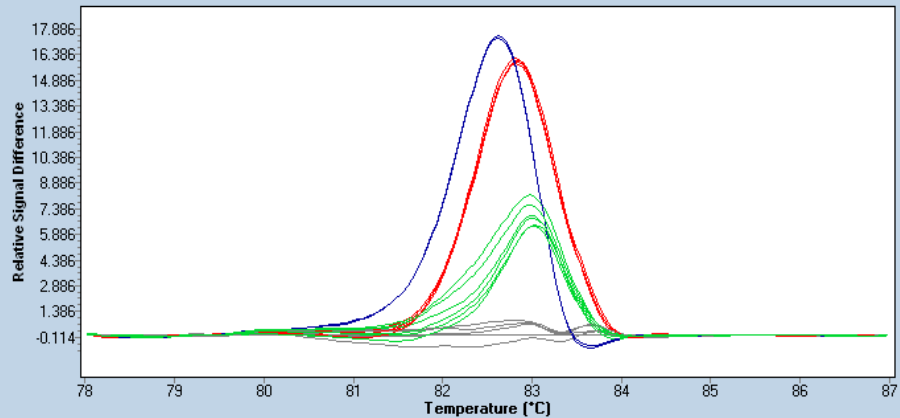

Melting Peaks

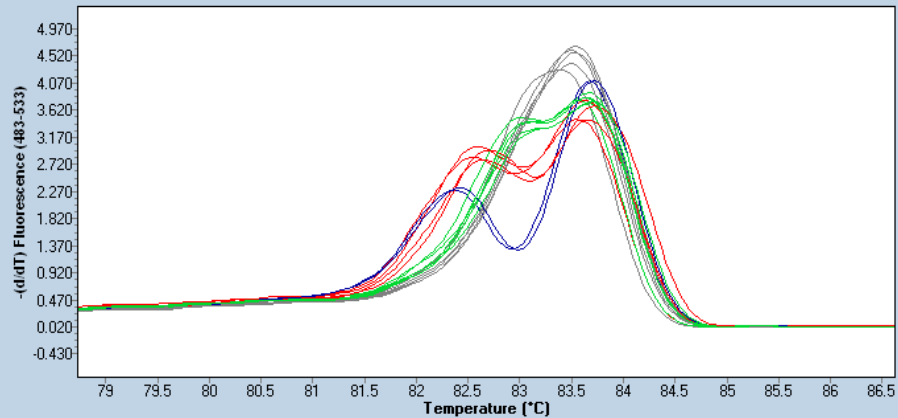

Supplement: MOESM8 [file 9461894]
